# Supplementary material for: Euodia daniellii Hemsl. Extract and Its Active Component Hesperidin Accelerate Cutaneous Wound Healing via Activation of Wnt/β-Catenin Signaling Pathway
Source: MDPI journal article supplement (doi:10.3390/molecules27207134), 2022-10-21
Supplement: s1 [file s1]

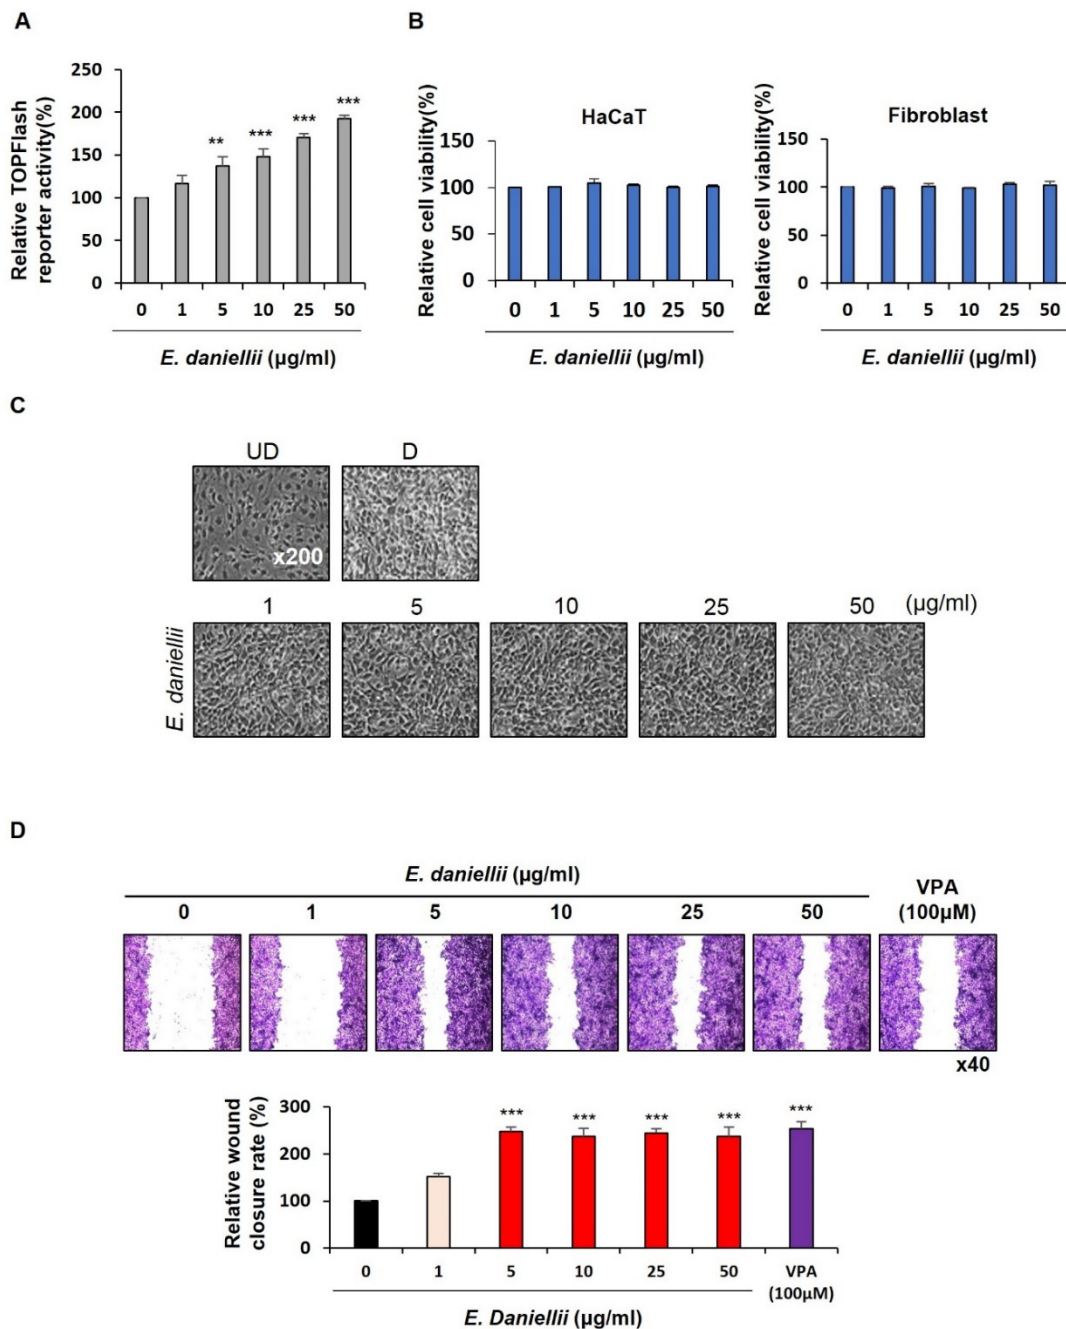

**Supplementary Figure S1. TOPFlash reporter activity, cellular toxicity tests, and concentration range test of *E. daniellii* extract.** (A) TOPFlash reporter activity of HEK293 cells treated with vehicle (0.1% DMSO), or shown concentrations of *E. daniellii* extract for 24 h (n = 3). (B) Cell viability of HaCaT keratinocytes and human dermal fibroblasts treated with vehicle (0.1% DMSO), or shown concentration of *E. daniellii* extract for 24 h (n = 3). (C) Brightfield images of cultured primary neural stem cell morphology treated by shown concentration of *E. daniellii* extract. (D) HaCaT keratinocytes were treated with vehicle (0.1% [v/v] DMSO), *E. daniellii* extract (1, 5, 10, 25, 50 µg/mL), or VPA (100 µM) for 24 h. The in vitro wound-healing assay was performed as described in the Materials and Methods section. Representative images of in vitro wound-healing assay (upper) and quantitative measurement of relative wound-closure rate (lower). Original magnification: (C), x200; (D), x40. Values are expressed as means ± SEM. \*\*, P < 0.005; \*\*\*, P < 0.0005, significantly different from vehicle, control or as indicated.

**A**

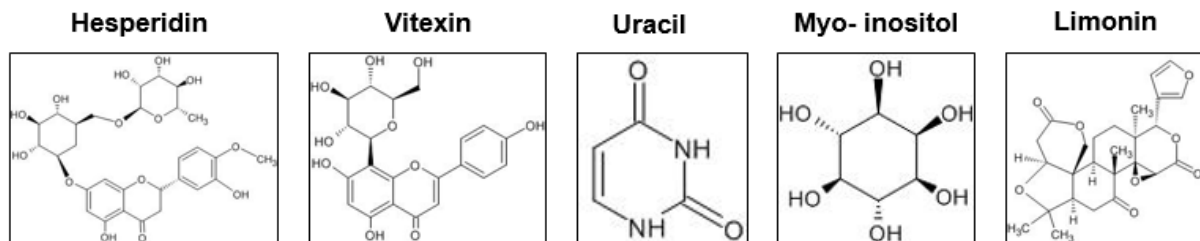

**B**

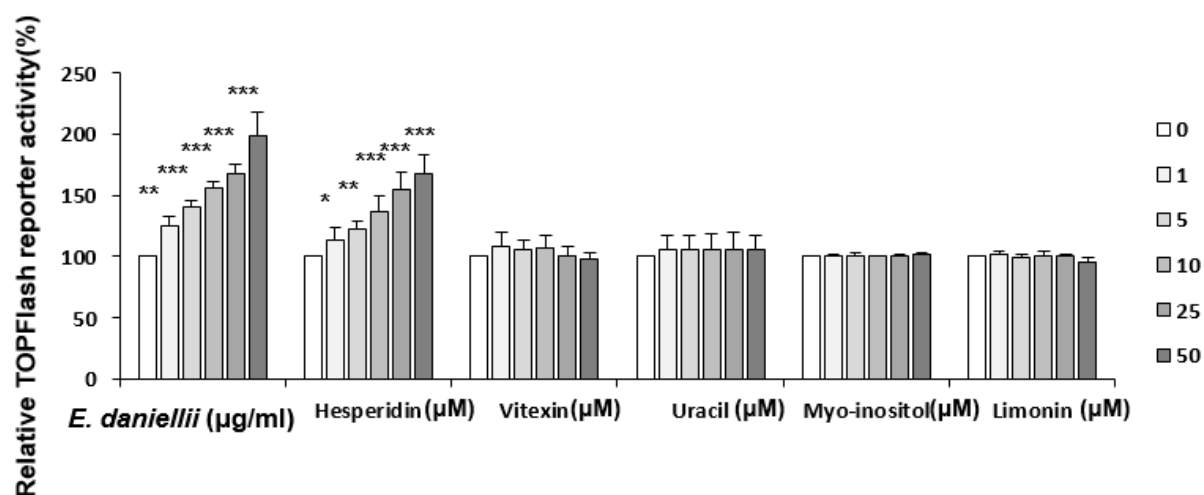

**Supplementary Figure S2. Structure of *E. daniellii* ingredients and TOPFlash reporter activity of hesperidin** (A) Structure of *E. daniellii* ingredients. (B) TOPFlash reporter activity of HEK293 cells treated with vehicle (0.1% DMSO), or shown concentrations of hesperidin, vitexin, limonin, myo-inositol, uracil for 24 h (n = 3). Values are expressed as means ± SEM. \*, P < 0.05; \*\*, P < 0.005; \*\*\*, P < 0.0005, significantly different from vehicle, control or as indicated.

A

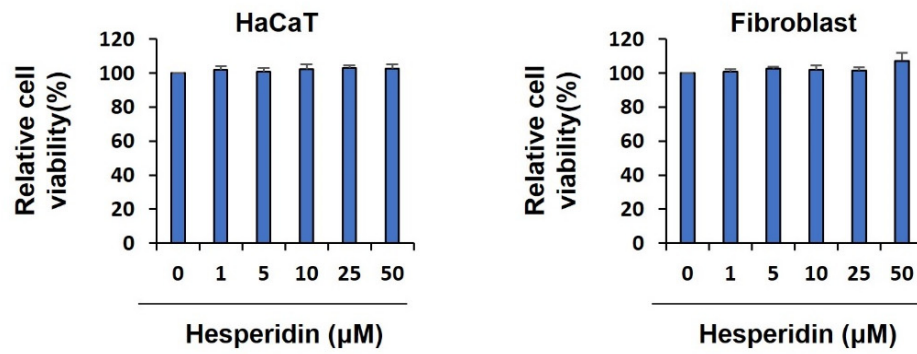

B

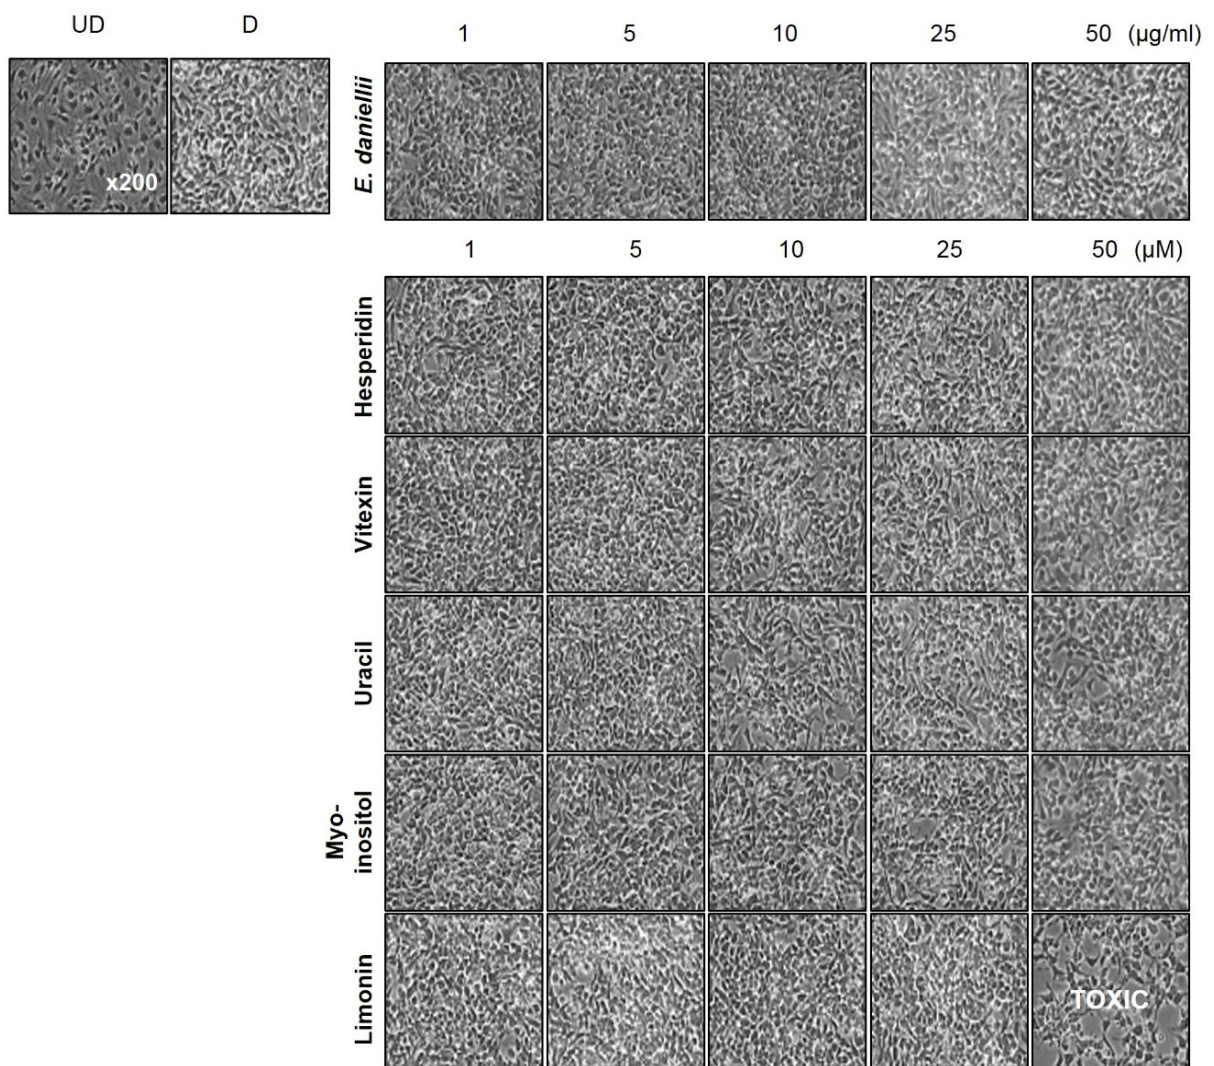

**Supplementary Figure S3. Cellular toxicity tests of hesperidin.** (A) Cell viability of HaCaT keratinocytes and human dermal fibroblasts treated with vehicle (0.1% DMSO), or shown concentration of hesperidin for 24 h (n = 3). (B) Brightfield image of cultured primary neural stem cell morphology treated by shown concentration of hesperidin for 24 h. Original magnification: (B) x200. Values are expressed as means ± SEM.

**A**

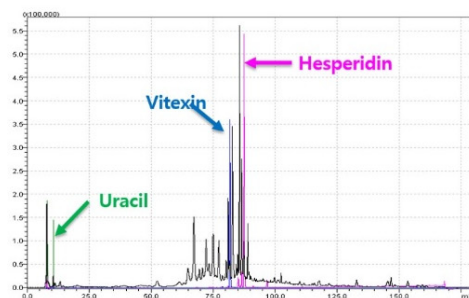

|                     | Retention time | Percentage in Extract |
|---------------------|----------------|-----------------------|
| <b>Hesperidin</b>   | 87.447         | 2.633 %               |
| <b>Vitexin</b>      | 81.774         | 1.620 %               |
| <b>Uracil</b>       | 10.559         | 0.355 %               |
| <b>Limonin</b>      | ND             | -                     |
| <b>Myo-inositol</b> | ND             | -                     |

**B**

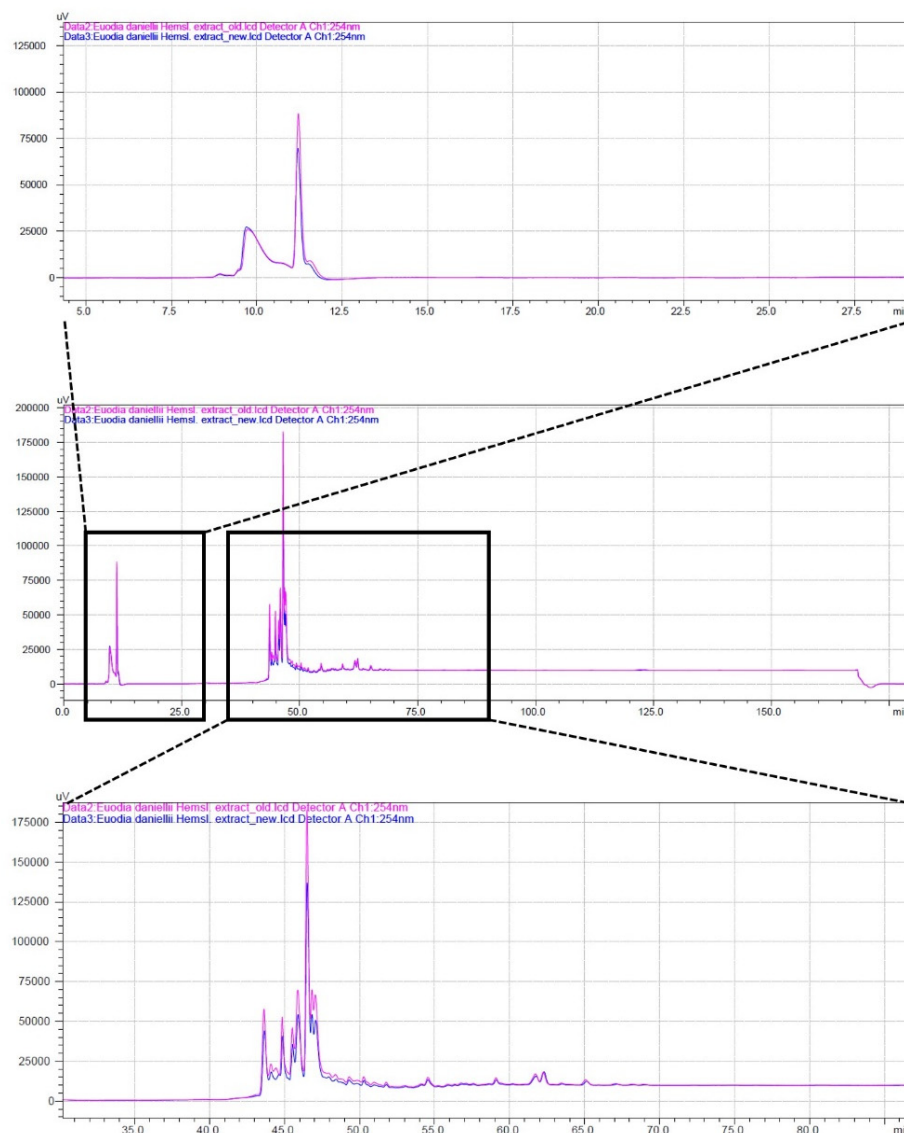

**Supplementary Figure S4. HPLC analysis of *E. daniellii* extract.** (A,B) HPLC analysis was performed as described in the Materials and Methods section. (A) The composition of vitexin, uracil and hesperidin in *E. daniellii* extract. (B) Chemical profile comparison of existing *E. daniellii* extract (*E. daniellii* extract old) and newly purchased *E. daniellii* extract (*E. daniellii* extract new).
